# Supplementary material
Source: publisher site journal article supplement (https://static.cambridge.org/content/id/urn:cambridge.org:id:article:S1754470X20000252/resource/name/S1754470X20000252supp003.docx)
Supplement: Supplementary file 1 [file S1754470X20000252supp003.docx]

| **Interaction** | **X2** | **df** | **p value** |
| --- | --- | --- | --- |
| A*F Quartile | 217.9 | 3 | <0.0005 |
| Age*GAD | 6.7 | 1 | .010 |
| Age*Recovery | 4.9 | 1 | .025 |
| F Quartile *Recovery | 10.1 | 3 | .018 |
| GAD*Improvement | 27.3 | 1 | <0.0005 |
| GAD*PHQ | 100.8 | 1 | <0.0005 |
| GAD*  Recovery | 13.1 | 1 | <0.0005 |
| PHQ*Improvement | 10.4 | 1 | .001 |
| Improvement *Recovery | 183.7 | 1 | <0.0005 |
| Gender | 139.4 | 1 | | <0.0005 | | --- | |

Table 1: Supplementary material

Generating class for best hierarchical log linear model
